# Supplementary material for: UQCRC1 downregulation impairs cognitive function in mice via AMPK inactivation
Source: PeerJ journal article supplement (doi:10.7717/peerj.19873), 2025-08-15
Supplement: fig_1B.xlsx [file fig_1B.xlsx]

## Sheet: Sheet1
		WT									UQCRC1+/-
	male	51.684	54.0056	56.2532	58.411	61.5502	62.7486	65.1886	67.7102		35.9567	36.2434	40.0483	40.7274	42.8583	46.4633	48.6355	53.893
	female	56.3878	65.2046	65.8679	49.9227	64.2933	60.6568	53.8563	69.2112		52.1459	56.3798	44.1611	58.7651	48.1814	52.7922	59.5354	50.2442
