# Supplementary material for: UQCRC1 downregulation impairs cognitive function in mice via AMPK inactivation
Source: PeerJ journal article supplement (doi:10.7717/peerj.19873), 2025-08-15
Supplement: fig_1D.xlsx [file fig_1D.xlsx]

## Sheet: Sheet1
			WT									UQCRC1+/-
		male	5	5	5	4	4	3	4	2		1	1	3	1	4	1	2	1
		female	2	5	5	5	4	4	4	3		5	4	2	2	4	3	2	1
