# Supplementary material for: UQCRC1 downregulation impairs cognitive function in mice via AMPK inactivation
Source: PeerJ journal article supplement (doi:10.7717/peerj.19873), 2025-08-15
Supplement: fig_1F.xlsx [file fig_1F.xlsx]

## Sheet: Sheet1
		male C57BL/6J mice									male UQCRC1+/- mice									female C57BL/6J mice									female UQCRC1+/- mice
	DAY 1	127.012	126.364	126.042	150.8	169.769	174.996	170.311	195.574		116.403	122.498	132.15	137.252	146.082	162.796	189.444	180.706		132.597	130.43	140.562	140.269	137.756	146.899	151.496	154.774		127.391	131.502	146.185	150.646	149.573	149.765	165.227	167.376
	DAY 2	112.368	106.075	104.029	109.735	112.374	148.189	157.847	179.467		112.798	122.717	124.785	132.868	138.813	153.602	146.222	164.469		102.157	99.3173	107.397	106.292	108.933	107.782	125.73	114.439		100.567	97.2318	119.885	121.015	128.358	128.726	132.508	141.697
	DAY 3	82.5057	68.6462	75.9921	85.081	92.1919	100.497	106.031	114.762		97.7851	94.636	96.4878	108.156	124.796	151.248	147.611	166.406		63.01	74.5957	75.7602	81.5956	88.4253	92.2749	87.5893	90.3424		75.9731	76.6769	87.4293	82.2759	98.5301	95.5434	88.1937	98.0505
	DAY 4	51.4726	55.4613	58.9399	66.4294	69.8303	75.8538	77.438	61.1113		87.9622	79.373	82.8076	95.2622	105.073	111.573	118.38	120.96		72.7182	73.8324	73.435	77.6272	79.6779	85.8377	71.7571	74.3111		79.8681	70.1738	70.2334	72.5582	79.062	85.3877	93.7598	95.1911
