# Supplementary material for: UQCRC1 downregulation impairs cognitive function in mice via AMPK inactivation
Source: PeerJ journal article supplement (doi:10.7717/peerj.19873), 2025-08-15
Supplement: fig_1G.xlsx [file fig_1G.xlsx]

## Sheet: Sheet1
		WT									UQCRC1+/-
	male	22.3639	13.1152	20.6636	21.426	17.0597	7.39719	35.5358	26.4102		24.1162	70.7129	62.0704	77.286	3.52612	21.3003	25.6047	67.4947
	female	32.5236	9.20069	11.5683	16.6667	8.60419	25.6037	40.7447	22.4496		15.3667	21.3	36.4833	33.7667	66.1667	23.3833	51.85	42.9167
