# Supplementary material for: UQCRC1 downregulation impairs cognitive function in mice via AMPK inactivation
Source: PeerJ journal article supplement (doi:10.7717/peerj.19873), 2025-08-15
Supplement: fig_1H.xlsx [file fig_1H.xlsx]

## Sheet: Sheet1
		WT									UQCRC1+/-
	male	1	1	1	1	2	3	2	1		1	2	2	3	3	4	5	5
	female	1	2	3	2	1	1	2	1		5	4	3	1	2	4	3	2
