# Supplementary material for: UQCRC1 downregulation impairs cognitive function in mice via AMPK inactivation
Source: PeerJ journal article supplement (doi:10.7717/peerj.19873), 2025-08-15
Supplement: figure_2B.xlsx [file figure_2B.xlsx]

## Sheet: Sheet1
WT	UQCRC1+/-		WT	UQCRC1+/-
6.578	5.134		0.827023	0.645475
7.789	5.886		0.979276	0.740021
7.278	2.533		0.91503	0.318463
9.959	5.418		1.2521	0.681181
7.407	7.009		0.931249	0.88121
8.712	3.574		1.09532	0.449343
7.95383
