# Supplementary material for: UQCRC1 downregulation impairs cognitive function in mice via AMPK inactivation
Source: PeerJ journal article supplement (doi:10.7717/peerj.19873), 2025-08-15
Supplement: figure_2C.xlsx [file figure_2C.xlsx]

## Sheet: Sheet1
WT	UQCRC1+/-		WT	UQCRC1+/-
17.926	22.062		1.03218	1.27033
17.269	16.887		0.994348	0.972352
16.092	23.746		0.926576	1.36729
16.984	18.461		0.977937	1.06298
13.747	24.812		0.791551	1.42867
22.185	25.122		1.27741	1.44652
17.3672
