# Supplementary material for: UQCRC1 downregulation impairs cognitive function in mice via AMPK inactivation
Source: PeerJ journal article supplement (doi:10.7717/peerj.19873), 2025-08-15
Supplement: figure_2E.xlsx [file figure_2E.xlsx]

## Sheet: Sheet1
	WT	UQCRC1+/-		WT	UQCRC1+/-
	4	3		1.33333	1
	5	19		1.66667	6.33333
	4	6		1.33333	2
	1	8		0.333333	2.66667
	2	16		0.666667	5.33333
	2	12		0.666667	4
	3
