# Supplementary material for: UQCRC1 downregulation impairs cognitive function in mice via AMPK inactivation
Source: PeerJ journal article supplement (doi:10.7717/peerj.19873), 2025-08-15
Supplement: figure_2G.xlsx [file figure_2G.xlsx]

## Sheet: Sheet1
	LC3B	gapdh	expression of LC3B
1	14885.6	17176.1	0.866644			wt	uq			wt	uq
2	20207	18122.8	1.115			0.866644	1.115			1.0853	1.39631
3	14587.3	18139.2	0.804187			0.804187	1.11127			1.00708	1.39164
4	22093	19880.8	1.11127			0.728072	1.02658			0.911762	1.28559
5	14174.7	19468.8	0.728072			0.981826	1.28488			1.22954	1.60906
6	20201.6	19678.5	1.02658			0.964537	1.22336			1.20789	1.53201
7	14755.3	15028.4	0.981826			0.445931	0.900774			0.558438	1.12804
8	19318.8	15035.4	1.28488
9	15997.2	16585.4	0.964537			0.798533
10	19583.5	16008	1.22336
11	6979.01	15650.4	0.445931
12	13602.6	15101	0.900774
