# Supplementary material for: UQCRC1 downregulation impairs cognitive function in mice via AMPK inactivation
Source: PeerJ journal article supplement (doi:10.7717/peerj.19873), 2025-08-15
Supplement: figure_2H.xlsx [file figure_2H.xlsx]

## Sheet: Sheet1
		pAMPK	GAPDH	expression of pAMPK
	1	21124.4	17604.4	1.19995
	2	3071.58	18458.3	0.166407
	3	20468.6	16777.7	1.21999
	4	3786.65	17955.5	0.210891
	5	20255	15055.3	1.34538
	6	3158.53	16495.7	0.191476
	7	21867.6	16812.3	1.30069
	8	4869.18	17799.4	0.273559
	9	20665.2	15085.1	1.36991
	10	3952.11	14769.1	0.267593
	11	18006	14120.1	1.2752
	12	2011.06	16844.6	0.119389
			expression of pAMPK
			W	UQ
			1.19995	0.166407
			1.21999	0.210891
			1.34538	0.191476
			1.30069	0.273559
			1.36991	0.267593
			1.2752	0.119389
			1.28519
			expression of pAMPK
			W	UQ
			0.933679	0.129481
			0.94927	0.164094
			1.04683	0.148987
			1.01206	0.212856
			1.06592	0.208213
			0.992232	0.0928964
