# Supplementary material for: UQCRC1 downregulation impairs cognitive function in mice via AMPK inactivation
Source: PeerJ journal article supplement (doi:10.7717/peerj.19873), 2025-08-15
Supplement: figure_2I.xlsx [file figure_2I.xlsx]

## Sheet: Sheet1
	AMPK	GAPDH	expression of AMPK
1	12244.1	17604.4	0.69551
2	15068.4	18458.3	0.816349
3	15871.5	16777.7	0.945992
4	18102.4	17955.5	1.00818
5	19282.1	15055.3	1.28075
6	15599.5	16495.7	0.945672
7	17043.1	16812.3	1.01373
8	19529.5	17799.4	1.0972
9	18288	15085.1	1.21232
10	18150	14769.1	1.22891
11	14860	14120.1	1.0524
12	13492.5	16844.6	0.800997
		expression of AMPK
		W	UQ
		0.69551	0.816349
		0.945992	1.00818
		1.28075	0.945672
		1.01373	1.0972
		1.21232	1.22891
		1.0524	0.800997
		1.03345
		expression of AMPK
		W	UQ
		0.672999	0.789926
		0.915374	0.975549
		1.2393	0.915064
		0.980916	1.06169
		1.17308	1.18914
		1.01833	0.775072
