# Supplementary material for: UQCRC1 downregulation impairs cognitive function in mice via AMPK inactivation
Source: PeerJ journal article supplement (doi:10.7717/peerj.19873), 2025-08-15
Supplement: figure_2J.xlsx [file figure_2J.xlsx]

## Sheet: Sheet1
	AMPK	pAMPK	AMPK/pAMPK
1	12244.1	21124.4	1.72528
2	15068.4	3071.58	0.203843
3	15871.5	20468.6	1.28964
4	18102.4	3786.65	0.20918
5	19282.1	20255	1.05046
6	15599.5	3158.53	0.202476
7	17043.1	21867.6	1.28308
8	19529.5	4869.18	0.249324
9	18288	20665.2	1.12999
10	18150	3952.11	0.217748
11	14860	18006	1.21171
12	13492.5	2011.06	0.149051
		AMPK/pAMPK
		W	UQ
		1.72528	0.203843
		1.28964	0.20918
		1.05046	0.202476
		1.28308	0.249324
		1.12999	0.217748
		1.21171	0.149051
		1.28169
		AMPK/pAMPK
		W	UQ
		1.3461	0.159042
		1.0062	0.163206
		0.819585	0.157976
		1.00108	0.194527
		0.881638	0.169891
		0.945401	0.116292
