# Supplementary material for: UQCRC1 downregulation impairs cognitive function in mice via AMPK inactivation
Source: PeerJ journal article supplement (doi:10.7717/peerj.19873), 2025-08-15
Supplement: figure_2K.xlsx [file figure_2K.xlsx]

## Sheet: Summary
Group	flcn	fnip1	fnip2		Group	flcn	fnip1	fnip2
WT	1.13286	0.964184	1.02212		UQ	1.64419	1.87201	1.42609
WT	0.985228	0.977952	1.08198		UQ	1.47496	2.00748	1.65104
WT	0.895958	1.06053	0.904233		UQ	1.70317	2.03251	1.51389
	1.00468	1.00089	1.00278
Group	flcn	fnip1	fnip2		Group	flcn	fnip1	fnip2
WT	1.12758	0.963329	1.01929		UQ	1.63653	1.87034	1.42214
WT	0.980637	0.977084	1.07898		UQ	1.46809	2.0057	1.64647
WT	0.891783	1.05959	0.901729		UQ	1.69524	2.03071	1.5097
		WT				UQ
	flcn	1.12758	0.980637	0.891783		1.63653	1.46809	1.69524
	fnip1	0.963329	0.977084	1.05959		1.87034	2.0057	2.03071
	fnip2	1.01929	1.07898	0.901729		1.42214	1.64647	1.5097

## Sheet: FLCN
Target	Group	CQ			Target	Group	CQ	Δcq	mean	ΔΔcq	2^-ΔΔcq
GAPDH	UQ	17.2546			FLCN	UQ	23.2387	5.25312		-0.717375	1.64419
GAPDH	UQ	17.7959			FLCN	UQ	23.3954	5.40981		-0.560679	1.47496
GAPDH	UQ	18.9064	17.9856		FLCN	UQ	23.1879	5.20227		-0.768225	1.70317
GAPDH	WT	16.9971			FLCN	WT	23.6538	5.79053		-0.179967	1.13286
GAPDH	WT	17.9518			FLCN	WT	23.8553	5.99196		0.02147	0.985228
GAPDH	WT	18.641	17.8633		FLCN	WT	23.9923	6.12899	5.97049	0.158497	0.895958

## Sheet: FNIP1
Target	Group	CQ			Target	Group	CQ	Δcq	mean	ΔΔcq	2^-ΔΔcq
GAPDH	UQ	17.3762			FNIP1	UQ	22.2798	4.85406		-0.904585	1.87201
GAPDH	UQ	17.5097			FNIP1	UQ	22.179	4.75325		-1.00539	2.00748
GAPDH	UQ	17.3913	17.4257		FNIP1	UQ	22.1611	4.73538		-1.02326	2.03251
GAPDH	WT	17.3981			FNIP1	WT	23.2065	5.81126		0.052619	0.964184
GAPDH	WT	17.4339			FNIP1	WT	23.1861	5.79081		0.0321644	0.977952
GAPDH	WT	17.3538	17.3953		FNIP1	WT	23.0691	5.67386	5.75864	-0.0847835	1.06053

## Sheet: FNIP2
Target	Group	CQ			Target	Group	CQ	Δcq	mean	ΔΔcq	2^-ΔΔcq
GAPDH	UQ	18.2588			FNIP2	UQ	20.7697	3.36209		-0.512067	1.42609
GAPDH	UQ	17.2505			FNIP2	UQ	20.5584	3.15078		-0.723376	1.65104
GAPDH	UQ	16.7137	17.4077		FNIP2	UQ	20.6835	3.2759		-0.598263	1.51389
GAPDH	WT	15.202			FNIP2	WT	21.9095	3.8426		-0.0315613	1.02212
GAPDH	WT	17.47			FNIP2	WT	21.8274	3.76049		-0.113673	1.08198
GAPDH	WT	21.5287	18.0669		FNIP2	WT	22.0863	4.01939	3.87416	0.145234	0.904233
