# Supplementary material for: UQCRC1 downregulation impairs cognitive function in mice via AMPK inactivation
Source: PeerJ journal article supplement (doi:10.7717/peerj.19873), 2025-08-15
Supplement: figure_2L.xlsx [file figure_2L.xlsx]

## Sheet: Sheet1
		WT							UQCRCQ+/-
	Caspase 3	8.133	5.676	8.068	11.187	12.256	6.051		42.285	45.591	58.757	53.494	44.41	28.984
	Caspase 9	14.43	21.984	12.586	15.749	11.737	16.101		24.293	36.175	47.979	40.273	55.934	45.651
							8.56183
							15.4312
		WT							UQCRCQ+/-
	Caspase 3	0.949913	0.662942	0.942322	1.30661	1.43147	0.706741		4.93878	5.32491	6.86267	6.24796	5.18697	3.38526
	Caspase 9	0.93512	1.42465	0.815622	1.0206	0.760604	1.04341		1.57428	2.34428	3.10923	2.60985	3.62474	2.95836
