# Supplementary material for: UQCRC1 downregulation impairs cognitive function in mice via AMPK inactivation
Source: PeerJ journal article supplement (doi:10.7717/peerj.19873), 2025-08-15
Supplement: figure_3B.xlsx [file figure_3B.xlsx]

## Sheet: Sheet1
WT	UQCRC1+/-+solvent	UQCRC1+/-+A-769662	UQCRC1+/-+LH2−051			WT	UQCRC1+/-+solvent	UQCRC1+/-+A-769662	UQCRC1+/-+LH2−051
8.594	2.717	5.937	5.453			0.930053	0.294037	0.642509	0.59013
8.064	3.744	8.129	6.946			0.872696	0.40518	0.87973	0.751704
10.487	5.829	7.224	6.736			1.13492	0.630821	0.78179	0.728978
8.853	6.048	9.517	6.571			0.958082	0.654522	1.02994	0.711122
11.507	5.201	9.537	8.017			1.2453	0.562858	1.03211	0.867609
7.937	2.897	8.062	7.33			0.858952	0.313517	0.872479	0.793261
9.24033
S
