# Supplementary material for: UQCRC1 downregulation impairs cognitive function in mice via AMPK inactivation
Source: PeerJ journal article supplement (doi:10.7717/peerj.19873), 2025-08-15
Supplement: figure_3C.xlsx [file figure_3C.xlsx]

## Sheet: Sheet1
WT	UQCRC1+/-+solvent	UQCRC1+/-+A-769662	UQCRC1+/-+LH2−051		WT	UQCRC1+/-+solvent	UQCRC1+/-+A-769662	UQCRC1+/-+LH2−051
20.465	37.617	28.336	28.452		0.869045	1.5974	1.20329	1.20821
24.756	36.482	31.81	35.026		1.05126	1.54921	1.35081	1.48738
23.179	44.545	24.688	36.847		0.984295	1.8916	1.04837	1.56471
23.579	47.856	34.224	38.965		1.00128	2.0322	1.45332	1.65465
27.624	38.764	37.198	36.58		1.17305	1.64611	1.57961	1.55337
21.69	47.076	25.919	30.014		0.921065	1.99908	1.10065	1.27454
23.5488
