# Supplementary material for: UQCRC1 downregulation impairs cognitive function in mice via AMPK inactivation
Source: PeerJ journal article supplement (doi:10.7717/peerj.19873), 2025-08-15
Supplement: figure_3E.xlsx [file figure_3E.xlsx]

## Sheet: Sheet1
WT	UQCRC1+/-+solvent	UQCRC1+/-+A-769662	UQCRC1+/-+LH2−051		WT	UQCRC1+/-+solvent	UQCRC1+/-+A-769662	UQCRC1+/-+LH2−051
3	18	9	3		1	6	3	1
3	10	6	11		1	3.33333	2	3.66667
4	8	9	6		1.33333	2.66667	3	2
2	16	6	4		0.666667	5.33333	2	1.33333
5	8	6	4		1.66667	2.66667	2	1.33333
1	12	4	9		0.333333	4	1.33333	3
3
