# Supplementary material for: UQCRC1 downregulation impairs cognitive function in mice via AMPK inactivation
Source: PeerJ journal article supplement (doi:10.7717/peerj.19873), 2025-08-15
Supplement: figure_3G.xlsx [file figure_3G.xlsx]

## Sheet: Sheet1
	LC			GAPDH
1	9908.72		1	13835
2	10969.7		2	14302
3	11406.8		3	16049
4	18395.2		4	16912.3
5	18316		5	18258.7
6	17775.2		6	16708.7
7	11517.7		7	15368
8	11246		8	15149.4
9	11784.5		9	16657.7
10	12093.1		10	15461.3
11	11279.5		11	15688.7
12	12245.1		12	16241

## Sheet: Sheet2
GROUP	LC	GAPDH	expression of LC3B
1	9908.72	13835	0.716206
1	10969.7	14302	0.767002
1	11406.8	16049	0.710753
2	18395.2	16912.3	1.08768		expression of LC3B					expression of LC3B
2	18316	18258.7	1.00314		WT	UQCRC1+/-+solvent	UQCRC1+/-+A-769662	UQCRC1+/-+LH2−051		WT	UQCRC1+/-+solvent	UQCRC1+/-+A-769662	UQCRC1+/-+LH2−051
2	17775.2	16708.7	1.06383		0.716206	1.08768	0.74946	0.782154		0.979333	1.48729	1.0248	1.06951
3	11517.7	15368	0.74946		0.767002	1.00314	0.742339	0.718961		1.04879	1.37168	1.01507	0.983101
3	11246	15149.4	0.742339		0.710753	1.06383	0.707455	0.753963		0.971876	1.45467	0.967367	1.03096
3	11784.5	16657.7	0.707455
4	12093.1	15461.3	0.782154		0.73132
4	11279.5	15688.7	0.718961
4	12245.1	16241	0.753963
