# Supplementary material for: UQCRC1 downregulation impairs cognitive function in mice via AMPK inactivation
Source: PeerJ journal article supplement (doi:10.7717/peerj.19873), 2025-08-15
Supplement: figure_3HIJ.xlsx [file figure_3HIJ.xlsx]

## Sheet: Sheet1
group	AMPK	pAMPK	GAPDH	expression of AMPK	expression of pAMPK	pAMPK/AMPK		expression of AMPK					expression of pAMPK					pAMPK/AMPK
1	6654.8	1.21427e+06	11701.5	0.568715	103.771	182.466		0.568715	0.808894	0.858234	0.893215		103.771	36.9021	81.8929	27.8237		182.466	45.6204	95.4202	31.1501
1	9240.57	1.24369e+06	13914.9	0.664079	89.3783	134.59		0.664079	0.72835	0.835928	0.813101		89.3783	27.5359	78.4938	20.1719		134.59	37.8058	93.9002	24.8086
1	10696	1.06157e+06	15888.3	0.673199	66.8146	99.2494		0.673199	0.779954	0.934698	0.516429		66.8146	38.131	68.0089	20.2324		99.2494	48.8888	72.7603	39.1775
2	9242.94	421667	11426.6	0.808894	36.9021	45.6204
2	8343.37	315428	11455.2	0.72835	27.5359	37.8058		0.635331					86.6546					138.768
2	9288.52	454104	11909.1	0.779954	38.131	48.8888
3	12671.7	1.20913e+06	14764.8	0.858234	81.8929	95.4202		expression of AMPK					expression of pAMPK					pAMPK/AMPK
3	13239.8	1.24322e+06	15838.4	0.835928	78.4938	93.9002		WT	UQCRC1+/-+solvent	UQCRC1+/-+A-769662	UQCRC1+/-+LH2−051		WT	UQCRC1+/-+solvent	UQCRC1+/-+A-769662	UQCRC1+/-+LH2−051		WT	UQCRC1+/-+solvent	UQCRC1+/-+A-769662	UQCRC1+/-+LH2−051
3	15375.8	1.11875e+06	16450	0.934698	68.0089	72.7603		0.895148	1.27319	1.35085	1.4059		1.19752	0.425853	0.945049	0.321088		1.31489	0.328752	0.687623	0.224476
4	12920.2	402467	14464.9	0.893215	27.8237	31.1501		1.04525	1.14641	1.31574	1.27981		1.03143	0.317766	0.905824	0.232785		0.969889	0.272439	0.676669	0.178777
4	11589.3	287515	14253.2	0.813101	20.1719	24.8086		1.0596	1.22763	1.4712	0.81285		0.771045	0.440034	0.784828	0.233483		0.715217	0.352305	0.524329	0.282323
4	7315.36	286598	14165.3	0.516429	20.2324	39.1775
								WT	UQCRC1+/-+solvent	UQCRC1+/-+A-769662	UQCRC1+/-+LH2−051		WT	UQCRC1+/-+solvent	UQCRC1+/-+A-769662	UQCRC1+/-+LH2−051		WT	UQCRC1+/-+solvent	UQCRC1+/-+A-769662	UQCRC1+/-+LH2−051
								0.895148	1.27319	1.22741	1.4059		1.19752	0.425853	0.945049	0.321088		1.33779	0.334478	0.76995	0.228385
								1.04525	1.14641	1.12764	1.27981		1.03143	0.317766	0.905824	0.232785		0.98678	0.277183	0.803292	0.181891
								1.0596	1.22763	1.17647	0.81285		0.771045	0.440034	0.784828	0.233483		0.727673	0.358441	0.667104	0.28724

## Sheet: Sheet2
group	AMPK	pAMPK	GAPDH	expression of AMPK	expression of pAMPK	pAMPK/AMPK		expression of AMPK					expression of pAMPK					pAMPK/AMPK
1	6654.8	1.21427e+06	11701.5	0.568715	103.771	182.466		WT	UQCRC1+/-+solvent	UQCRC1+/-+A-769662	UQCRC1+/-+LH2−051		WT	UQCRC1+/-+solvent	UQCRC1+/-+A-769662	UQCRC1+/-+LH2−051		WT	UQCRC1+/-+solvent	UQCRC1+/-+A-769662	UQCRC1+/-+LH2−051
1	9240.57	1.24369e+06	13914.9	0.664079	89.3782	134.59		0.568715	0.808894	0.779815	0.893215		103.771	36.9021	81.8928	27.8237		182.466	45.6204	105.016	31.1501
1	10696	1.06157e+06	15888.3	0.673199	66.8146	99.2494		0.664079	0.72835	0.716424	0.813101		89.3782	27.5359	78.4938	20.1719		134.59	37.8058	109.563	24.8086
2	9242.94	421667	11426.6	0.808894	36.9021	45.6204		0.673199	0.779954	0.747448	0.516429		66.8146	38.131	68.0089	20.2324		99.2494	48.8888	90.9882	39.1775
2	8343.37	315428	11455.2	0.72835	27.5359	37.8058
2	9288.52	454104	11909.1	0.779954	38.131	48.8888		0.635331					86.6546					138.768
3	12089.5	1.26959e+06	15503.1	0.779815	81.8928	105.016
3	12254.8	1.34267e+06	17105.5	0.716424	78.4938	109.563		expression of AMPK					expression of pAMPK					pAMPK/AMPK
3	13771	1.253e+06	18424	0.747448	68.0089	90.9882		WT	UQCRC1+/-+solvent	UQCRC1+/-+A-769662	UQCRC1+/-+LH2−051		WT	UQCRC1+/-+solvent	UQCRC1+/-+A-769662	UQCRC1+/-+LH2−051		WT	UQCRC1+/-+solvent	UQCRC1+/-+A-769662	UQCRC1+/-+LH2−051
4	12920.2	402467	14464.9	0.893215	27.8237	31.1501		0.895148	1.27319	1.22741	1.4059		1.19752	0.425853	0.945049	0.321088		1.31489	0.328753	0.756771	0.224476
4	11589.3	287514	14253.2	0.813101	20.1719	24.8086		1.04525	1.14641	1.12764	1.27981		1.03143	0.317766	0.905824	0.232785		0.969889	0.272439	0.789541	0.178777
4	7315.36	286597	14165.3	0.516429	20.2324	39.1775		1.0596	1.22763	1.17647	0.81285		0.771045	0.440034	0.784828	0.233483		0.715217	0.352305	0.655684	0.282323
