# Supplementary material for: UQCRC1 downregulation impairs cognitive function in mice via AMPK inactivation
Source: PeerJ journal article supplement (doi:10.7717/peerj.19873), 2025-08-15
Supplement: figure_3K.xlsx [file figure_3K.xlsx]

## Sheet: Sheet1
		WT							UQCRC1+/-+solvent							UQCRC1+/-+A-769662							UQCRC1+/-+LH2−051
	Caspase 3	19.052	8.111	18.869	12.384	14.175	9.884		80.749	85.942	75.165	43.562	83.108	78.051		20.965	15.244	28.612	19.486	27.802	17.796		21.798	21.73	29.074	33.422	29.505	27.474
	Caspase 9	26.887	22.517	28.97	29.43	30.754	22.385		59.775	51.668	57.83	64.067	82.08	78.273		36.415	33.345	33.526	33.785	35.544	25.795		29.649	28.096	37.461	43.287	24.194	45.434
							13.7458
							26.8238
		WT							UQCRC1+/-+solvent							UQCRC1+/-+A-769662							UQCRC1+/-+LH2−051
	Caspase 3	1.38602	0.59007	1.37271	0.900928	1.03122	0.719054		5.87443	6.25222	5.4682	3.16911	6.04605	5.67816		1.52519	1.10899	2.0815	1.41759	2.02258	1.29465		1.58579	1.58084	2.11511	2.43143	2.14647	1.99871
	Caspase 9	1.00235	0.83944	1.08001	1.09716	1.14652	0.834519		2.22843	1.9262	2.15592	2.38844	3.05997	2.91804		1.35756	1.24311	1.24986	1.25951	1.32509	0.961645		1.10532	1.04743	1.39656	1.61375	0.901959	1.69379
