# Supplementary material for: UQCRC1 downregulation impairs cognitive function in mice via AMPK inactivation
Source: PeerJ journal article supplement (doi:10.7717/peerj.19873), 2025-08-15
Supplement: figure_4B.xlsx [file figure_4B.xlsx]

## Sheet: Sheet1
WT	UQCRC1+/-+solvent	UQCRC1+/-+A-769662	UQCRC1+/-+LH2−051
65.885	39.4985	54.4447	47.5705
53.5598	42.0348	50.5299	58.04
60.6889	43.8053	60.1006	61.3723
66.8902	36.1186	52.0572	47.7103
53.031	43.0205	55.2598	54.8984
64.3059	41.3225	65.374	44.2338
52.7933	38.1305	48.3651	47.0907
54.6652	42.1713	47.8084	52.6141
