# Supplementary material for: UQCRC1 downregulation impairs cognitive function in mice via AMPK inactivation
Source: PeerJ journal article supplement (doi:10.7717/peerj.19873), 2025-08-15
Supplement: figure_4D.xlsx [file figure_4D.xlsx]

## Sheet: Sheet1
WT	UQCRC1+/-+solvent	UQCRC1+/-+A-769662	UQCRC1+/-+LH2−051
5	2	1	2
5	1	4	3
4	1	3	3
4	2	4	2
3	3	5	5
3	1	2	4
1	2	4	3
4	1	4	2
