# Supplementary material for: UQCRC1 downregulation impairs cognitive function in mice via AMPK inactivation
Source: PeerJ journal article supplement (doi:10.7717/peerj.19873), 2025-08-15
Supplement: figure_4F.xlsx [file figure_4F.xlsx]

## Sheet: Sheet1
		WT									UQCRC1+/-+solvent									UQCRC1+/-+A-769662									UQCRC1+/-+LH2−051
	DAY 1	141.446	138.75	143.184	148.358	195.178	198.734	165.674	187.179		120.758	132.452	134.385	150.247	143.083	158.001	203.528	204.189		153.113	124.078	153.456	170.274	213.725	227.611	169.416	173.671		166.072	131.99	120.683	139.454	163.21	198.824	155.414	172.039
	DAY 2	107.753	120.524	91.289	113.574	122.269	136.91	177.802	160.242		126.145	126.649	130.93	143.188	142.905	170.476	146.63	165.133		112.012	132.783	90.114	115.851	125.494	124.199	178.933	137.423		109.008	120.8	101.152	102.635	122.942	175.204	164.565	197.913
	DAY 3	91.227	76.908	82.39	74.987	86.237	87.169	107.779	116.268		93.834	87.207	109.624	120.198	119.848	163.727	133.173	182.292		98.327	87.969	83.091	76.752	92.596	77.271	119.566	131.064		82.417	73.413	75.423	96.862	104.721	117.495	112.404	119.371
	DAY 4	52.523	47.198	53.243	59.836	62.304	76.607	87.67	52.21		87.342	82.524	78.36	107.889	99.238	95.34	117.218	121.671		46.769	41.502	47.409	66.06	59.183	75.556	78.555	48.127		48.491	61.881	69.356	69.003	69.003	90.011	79.424	60.14
