# Supplementary material for: UQCRC1 downregulation impairs cognitive function in mice via AMPK inactivation
Source: PeerJ journal article supplement (doi:10.7717/peerj.19873), 2025-08-15
Supplement: figure_4G.xlsx [file figure_4G.xlsx]

## Sheet: Sheet1
WT	UQCRC1+/-+solvent	UQCRC1+/-+A-769662	UQCRC1+/-+LH2−051
5.54	26.975	53.808	29.668
5.536	15.107	13.511	22.153
5.561	55.861	14.775	27.942
19.949	39.935	29.726	18.312
11.583	43.637	35.693	27.434
16.765	72.415	24.57	21.749
13.096	44.427	4.314	29.441
18.517	61.213	26.856	12.683
