# Supplementary material for: UQCRC1 downregulation impairs cognitive function in mice via AMPK inactivation
Source: PeerJ journal article supplement (doi:10.7717/peerj.19873), 2025-08-15
Supplement: figure_4H.xlsx [file figure_4H.xlsx]

## Sheet: Sheet1
WT	UQCRC1+/-+solvent	UQCRC1+/-+A-769662	UQCRC1+/-+LH2−051
1	4	2	3
3	3	3	1
1	3	1	3
2	4	1	4
5	4	2	2
1	5	2	2
3	5	4	5
2	6	5	2
