# Supplementary material for: UQCRC1 downregulation impairs cognitive function in mice via AMPK inactivation
Source: PeerJ journal article supplement (doi:10.7717/peerj.19873), 2025-08-15
Supplement: figure_S1B.xlsx [file figure_S1B.xlsx]

## Sheet: Sheet1
	LC3B	gapdh	expression of LC3B
1	9543.72	12777.9	0.74689			wt	uq			wt	uq
2	9835.43	14604.1	0.673471			0.74689	0.673471			0.766991	0.691596
1	10782.1	14101	0.764635			0.764635	0.69249			0.785213	0.711127
2	11113.3	16048.3	0.69249			1.14684	1.06563			1.17771	1.09431
1	18311.1	15966.5	1.14684			1.13135	1.11655			1.1618	1.1466
2	19319.5	18129.7	1.06563			1.07799	1.14598			1.107	1.17682
1	20695.3	18292.5	1.13135			0.97504	0.914227			1.00128	0.938832
2	20601.1	18450.7	1.11655
1	18994.5	17620.3	1.07799			0.973792
2	17986.7	15695.4	1.14598
1	16455.4	16876.7	0.97504
2	15248.2	16678.8	0.914227
