# Supplementary material for: UQCRC1 downregulation impairs cognitive function in mice via AMPK inactivation
Source: PeerJ journal article supplement (doi:10.7717/peerj.19873), 2025-08-15
Supplement: figure_S1C.xlsx [file figure_S1C.xlsx]

## Sheet: Sheet1
	AMPK	GAPDH	expression of AMPK
1	9338.6	14424.9	0.647395
2	10960.4	17733.4	0.618063
1	13377.7	17888.7	0.74783
2	14442.3	18839.3	0.766604
1	13848.1	16612.1	0.833615
2	12886	14294.4	0.901471
1	14516.3	17422.5	0.83319
2	16488.7	15946	1.03404
1	16762.1	15922.4	1.05273
2	16631.8	18478.3	0.900076
1	15243.1	17963.1	0.848581
2	16716	14587.3	1.14593
		expression of AMPK
		W	UQ
		0.647395	0.618063
		0.74783	0.766604
		0.833615	0.901471
		0.83319	1.03404
		1.05273	0.900076
		0.848581	1.14593
		0.827224
		expression of AMPK
		W	UQ
		0.782611	0.747153
		0.904023	0.926719
		1.00773	1.08975
		1.00721	1.25001
		1.27261	1.08807
		1.02582	1.38527
