# Supplementary material for: UQCRC1 downregulation impairs cognitive function in mice via AMPK inactivation
Source: PeerJ journal article supplement (doi:10.7717/peerj.19873), 2025-08-15
Supplement: figure_S1D.xlsx [file figure_S1D.xlsx]

## Sheet: Sheet1
		pAMPK	GAPDH	expression of pAMPK
	1	7296.18	14424.9	0.505805
	2	5939.43	17733.4	0.334928
	1	8686.43	17888.7	0.485581
	2	9365.25	18839.3	0.497114
	1	10748.5	16612.1	0.647029
	2	10137	14294.4	0.709158
	1	12970	17422.5	0.744438
	2	13378.7	15946	0.839
	1	13295	15922.4	0.834983
	2	12980.1	18478.3	0.702455
	1	14301.5	17963.1	0.796163
	2	16427	14587.3	1.12612
			expression of pAMPK
			WT	UQ
			0.505805	0.334928
			0.485581	0.497114
			0.647029	0.709158
			0.744438	0.839
			0.834983	0.702455
			0.796163	1.12612
			0.669
			expression of pAMPK
			WT	UQ
			0.756062	0.50064
			0.725831	0.74307
			0.967158	1.06003
			1.11276	1.25411
			1.24811	1.05001
			1.19008	1.68329
