# Supplementary material for: UQCRC1 downregulation impairs cognitive function in mice via AMPK inactivation
Source: PeerJ journal article supplement (doi:10.7717/peerj.19873), 2025-08-15
Supplement: figure_S1E.xlsx [file figure_S1E.xlsx]

## Sheet: Sheet1
	AMPK	pAMPK	Pampk/AMPK
1	9338.6	7296.18	0.781293
2	10960.4	5939.43	0.5419
1	13377.7	8686.43	0.64932
2	14442.3	9365.25	0.648462
1	13848.1	10748.5	0.776172
2	12886	10137	0.786668
1	14516.3	12970	0.893479
2	16488.7	13378.7	0.811383
1	16762.1	13295	0.793157
2	16631.8	12980.1	0.780439
1	15243.1	14301.5	0.938229
2	16716	16427	0.982711
		Pampk/AMPK
		W	UQ
		0.781293	0.5419
		0.64932	0.648462
		0.776172	0.786668
		0.893479	0.811383
		0.793157	0.780439
		0.938229	0.982711
		0.805275
		Pampk/AMPK
		W	UQ
		0.970219	0.672938
		0.806334	0.805268
		0.96386	0.976893
		1.10953	1.00759
		0.984952	0.969158
		1.1651	1.22034
