# Supplementary material for: UQCRC1 downregulation impairs cognitive function in mice via AMPK inactivation
Source: PeerJ journal article supplement (doi:10.7717/peerj.19873), 2025-08-15
Supplement: figure_S1F.xlsx [file figure_S1F.xlsx]

## Sheet: Sheet1
WT	UQCRC1+/-		WT	UQCRC1+/-
26.307	32.582		1.14414	1.41705
24.137	37.544		1.04976	1.63286
22.209	20.508		0.96591	0.89193
21.978	24.044		0.955863	1.04572
16.148	24.228		0.702306	1.05372
27.178	30.557		1.18202	1.32898
22.9928
