# Supplementary material for: UQCRC1 downregulation impairs cognitive function in mice via AMPK inactivation
Source: PeerJ journal article supplement (doi:10.7717/peerj.19873), 2025-08-15
Supplement: figure_S1G.xlsx [file figure_S1G.xlsx]

## Sheet: Sheet1
WT	UQCRC1+/-		WT	UQCRC1+/-
7.975	9.398		0.819855	0.966144
10.756	11.197		1.10575	1.15109
8.995	7.237		0.924714	0.743986
9.671	9.726		0.994209	0.999863
10.022	8.194		1.03029	0.842369
10.945	5.29		1.12518	0.543828
9.72733
