# Supplementary material for: UQCRC1 downregulation impairs cognitive function in mice via AMPK inactivation
Source: PeerJ journal article supplement (doi:10.7717/peerj.19873), 2025-08-15
Supplement: Table_S1.xlsx [file Table_S1.xlsx]

## Sheet: Sheet1
Table S1. List of primers
	Forward	Reverse
FLCN	AGGGCACCCAGGCTATATCA	GACCAGGGCATACCTCACAG
FNIP1	GTGCCTCTTTCTTTGCAGTTCAC	AGCACAGCTTCGGGTAAGTG
FNIP2	CCTGCTCCAGAAGCTCTTCAA	CTCCGAACACGACCAACTGA
GAPDH	AGGTCGGTGTGAACGGATTTG	TGTAGACCATGTAGTTGAGGTCA
